# Supplementary material
Source: PubMed Central journal article supplement (PMC4417421)
Supplement: NIHMS675294-supplement-Supplemental.pdf [file NIHMS675294-supplement-Supplemental.pdf]

**Supplementary data to:**

**Magnetic nanoparticle hyperthermia induced cytosine deaminase expression in microencapsulated *E. coli* for enzyme-prodrug therapy.**

Krishnamurthy V. Nemani<sup>1</sup>, Riley C. Ennis<sup>2</sup>, Karl E. Griswold<sup>3,4,5</sup> and Barjor Gimi<sup>1,3,6\*</sup>

<sup>1</sup>Department of Radiology, Geisel School of Medicine at Dartmouth, Hanover, NH, USA.

<sup>2</sup>Dartmouth College, Hanover, NH, USA.

<sup>3</sup>Thayer School of Engineering, Dartmouth, Hanover, NH, USA.

<sup>4</sup>Department of Biological Sciences, Dartmouth, Hanover, NH, USA.

<sup>5</sup>Program in Molecular and Cellular Biology, Dartmouth, Hanover, NH, USA.

<sup>6</sup>Department of Medicine, Geisel School of Medicine at Dartmouth, Hanover, NH, USA.

**\*Corresponding Author**

Barjor Gimi

Associate Professor

354W Borwell, 1 Medical Center Drive, Lebanon, NH03756.

Fax: 001-603-650-1717; Tel: 001-603-650-3925.

Email: [Barjor.Gimi@Dartmouth.edu](mailto:Barjor.Gimi@Dartmouth.edu)

## Supplementary Figure S1

Heat induced expression of cytosine deaminase in engineered NM522 cells results in efficient conversion of 5-FC to 5-FU.

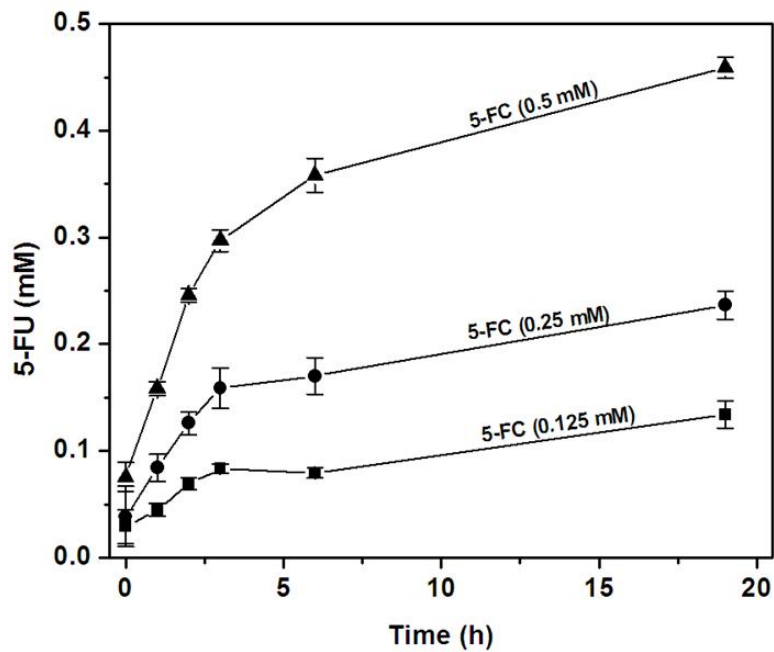

**Supplementary Fig. S1:** Engineered NM522 *E. coli* cells efficiently convert 5-FC to 5-FU when cultured at 42 °C but not at 30 °C. NM522 cells cultured at 42 °C (0.5 mg/ml) were incubated with 0.25 mM (■) and 0.5 mM (●) 5-FC in Tris-HCl buffer (50 mM, pH 7.4). The conversion of 5-FC to 5-FU was evaluated by UV-visible spectrophotometry.

## Supplementary Figure S2

Basal level expression of cytosine deaminase is minimal in engineered NM522 cells.

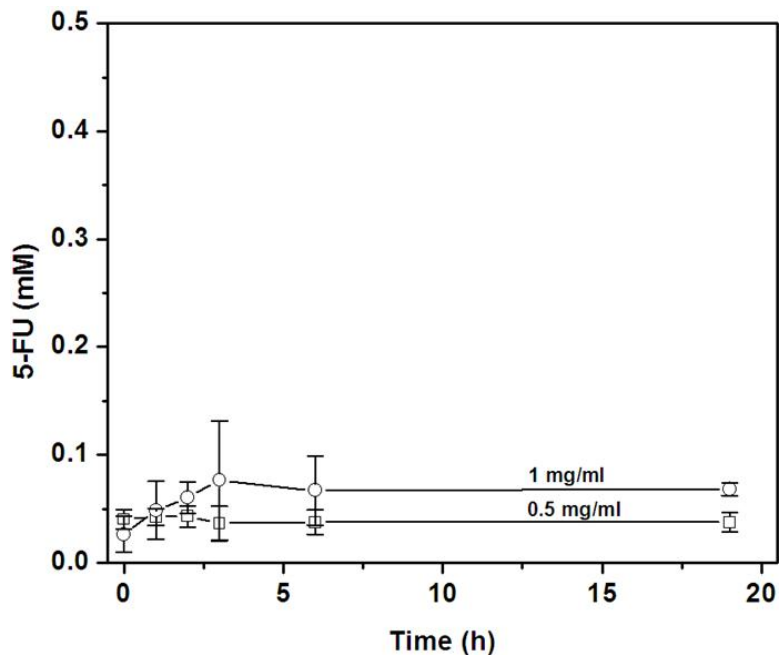

**Supplementary Fig. S2:** Basal expression of cytosine deaminase in engineered NM522 cells is minimal at 30 °C resulting in little to no conversion of 5-FC to 5-FU. NM522 cells cultured at 30 °C (□, 0.5 mg/ml and ○, 1 mg/ml) were incubated with 5-FC (0.5 mM) in Tris-HCl buffer (50 mM, pH 7.4). The conversion of 5-FC to 5-FU was evaluated using UV-visible spectrophotometry.

**AMF induced heating rate in alginate microcapsules is dependent on MNP concentration.**

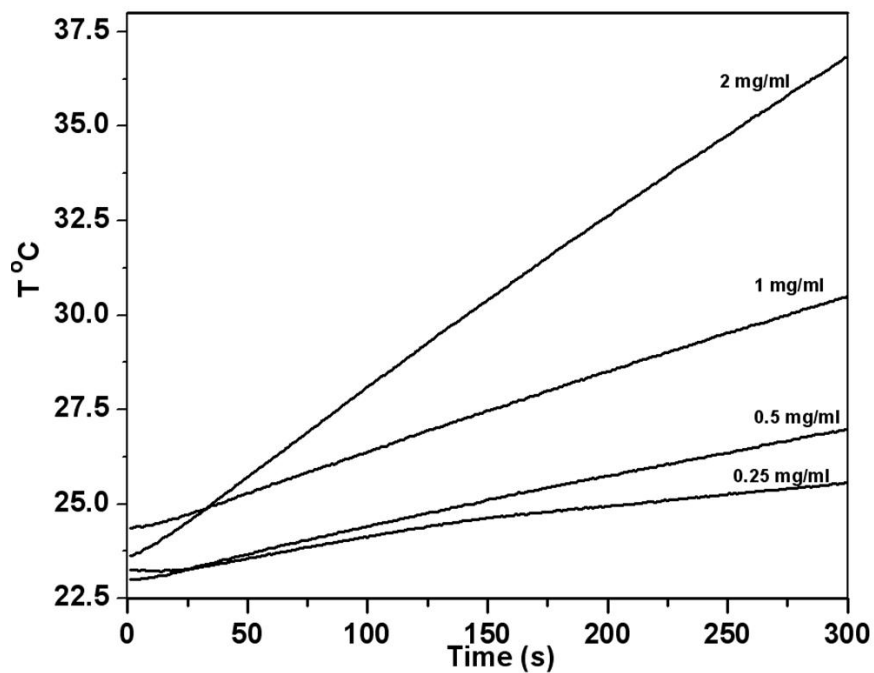

**Supplementary Fig. S3:** AMF induced magnetic nanoparticle hyperthermia in alginate microcapsules containing MNP. Four different concentrations of MNP; 0.25, 0.5, 1.0 and 2.0 mg/ml were encapsulated in alginate microcapsules and subjected to an AMF of 400 Oe. Efficient heating was observed in microcapsules containing 2 mg/ml of iron oxide.
